# Supplementary material
Source: Research Square preprint supplement (doi:10.21203/rs.3.rs-10251397/v1)
Supplement: Supplementary file 1 [file 2c0010f57e35516164677f24.docx]

**Supplementary Table 2. Detailed Classification-Based Machine Learning Outputs**

| **input** | **output** | **model** | **test_size** | **accuracy** | **cross_validation_accuracy_mean** | **cross_validation_accuracy_std** | **cross_validation_roc_auc_mean** | **cross_validation_roc_auc_std** | **calibration_brier_score** | **precision_binary** | **recall_binary** | **fscore_binary** |
| --- | --- | --- | --- | --- | --- | --- | --- | --- | --- | --- | --- | --- |
| glucose biomarker_a | treatment_response | support_vector_machine | 0.3 | 0.7 | 0.65 | 0.05 | 0.69 | 0.07 | 0.2248 | 0.72 | 0.67 | 0.7 |
| glucose biomarker_a sex | treatment_response | support_vector_machine | 0.3 | 0.7 | 0.65 | 0.04 | 0.68 | 0.06 | 0.2258 | 0.72 | 0.67 | 0.7 |
| glucose biomarker_a binary_group | treatment_response | random_forest | 0.3 | 0.69 | 0.64 | 0.04 | 0.69 | 0.05 | 0.2369 | 0.7 | 0.7 | 0.7 |
| glucose binary_group | treatment_response | logistic_regression | 0.3 | 0.68 | 0.66 | 0.03 | 0.7 | 0.03 | 0.2251 | 0.65 | 0.78 | 0.71 |
| biomarker_a sex | treatment_response | logistic_regression | 0.3 | 0.68 | 0.66 | 0.03 | 0.69 | 0.07 | 0.231 | 0.73 | 0.59 | 0.65 |
| biomarker_a sex | treatment_response | support_vector_machine | 0.3 | 0.68 | 0.65 | 0.04 | 0.68 | 0.06 | 0.2264 | 0.7 | 0.65 | 0.67 |
| biomarker_a | treatment_response | logistic_regression | 0.3 | 0.67 | 0.64 | 0.05 | 0.69 | 0.07 | 0.2283 | 0.69 | 0.63 | 0.66 |
| biomarker_a | treatment_response | support_vector_machine | 0.3 | 0.67 | 0.65 | 0.04 | 0.69 | 0.07 | 0.2254 | 0.69 | 0.63 | 0.66 |
| glucose biomarker_a binary_group | treatment_response | support_vector_machine | 0.3 | 0.67 | 0.67 | 0.05 | 0.76 | 0.04 | 0.2129 | 0.63 | 0.83 | 0.72 |
| glucose sex binary_group | treatment_response | logistic_regression | 0.3 | 0.67 | 0.67 | 0.05 | 0.68 | 0.04 | 0.2248 | 0.64 | 0.78 | 0.71 |
| glucose biomarker_a sex binary_group | treatment_response | logistic_regression | 0.3 | 0.67 | 0.67 | 0.04 | 0.74 | 0.04 | 0.2137 | 0.66 | 0.72 | 0.69 |
| glucose biomarker_a sex binary_group | treatment_response | support_vector_machine | 0.3 | 0.67 | 0.68 | 0.06 | 0.76 | 0.04 | 0.2129 | 0.63 | 0.83 | 0.72 |
| binary_group | treatment_response | logistic_regression | 0.3 | 0.66 | 0.66 | 0.04 | 0.67 | 0.04 | 0.2247 | 0.62 | 0.83 | 0.71 |
| binary_group | treatment_response | support_vector_machine | 0.3 | 0.66 | 0.66 | 0.04 | 0.67 | 0.04 | 0.2252 | 0.62 | 0.83 | 0.71 |
| binary_group | treatment_response | random_forest | 0.3 | 0.66 | 0.66 | 0.04 | 0.67 | 0.04 | 0.2253 | 0.62 | 0.83 | 0.71 |
| glucose binary_group | treatment_response | support_vector_machine | 0.3 | 0.66 | 0.66 | 0.04 | 0.7 | 0.03 | 0.2252 | 0.62 | 0.83 | 0.71 |
| biomarker_a binary_group | treatment_response | support_vector_machine | 0.3 | 0.66 | 0.66 | 0.04 | 0.77 | 0.06 | 0.2235 | 0.62 | 0.83 | 0.71 |
| sex binary_group | treatment_response | logistic_regression | 0.3 | 0.66 | 0.66 | 0.04 | 0.63 | 0.06 | 0.2247 | 0.62 | 0.83 | 0.71 |
| sex binary_group | treatment_response | support_vector_machine | 0.3 | 0.66 | 0.66 | 0.04 | 0.67 | 0.04 | 0.2252 | 0.62 | 0.83 | 0.71 |
| sex binary_group | treatment_response | random_forest | 0.3 | 0.66 | 0.66 | 0.04 | 0.68 | 0.05 | 0.2242 | 0.62 | 0.83 | 0.71 |
| glucose sex binary_group | treatment_response | support_vector_machine | 0.3 | 0.66 | 0.66 | 0.04 | 0.69 | 0.03 | 0.2252 | 0.62 | 0.83 | 0.71 |
| biomarker_a sex binary_group | treatment_response | support_vector_machine | 0.3 | 0.66 | 0.66 | 0.04 | 0.76 | 0.06 | 0.2235 | 0.62 | 0.83 | 0.71 |
| glucose biomarker_a sex | treatment_response | logistic_regression | 0.3 | 0.63 | 0.61 | 0.08 | 0.67 | 0.07 | 0.2308 | 0.64 | 0.65 | 0.65 |
| glucose biomarker_a binary_group | treatment_response | logistic_regression | 0.3 | 0.63 | 0.68 | 0.05 | 0.76 | 0.04 | 0.2129 | 0.64 | 0.65 | 0.65 |
| biomarker_a sex binary_group | treatment_response | random_forest | 0.3 | 0.63 | 0.65 | 0.05 | 0.69 | 0.06 | 0.2919 | 0.68 | 0.54 | 0.6 |
| glucose biomarker_a sex binary_group | treatment_response | random_forest | 0.3 | 0.63 | 0.68 | 0.05 | 0.69 | 0.04 | 0.2476 | 0.64 | 0.63 | 0.64 |
| biomarker_a binary_group | treatment_response | logistic_regression | 0.3 | 0.62 | 0.67 | 0.04 | 0.77 | 0.06 | 0.2135 | 0.6 | 0.76 | 0.67 |
| biomarker_a sex binary_group | treatment_response | logistic_regression | 0.3 | 0.62 | 0.67 | 0.05 | 0.75 | 0.06 | 0.2144 | 0.6 | 0.76 | 0.67 |
| glucose biomarker_a | treatment_response | logistic_regression | 0.3 | 0.61 | 0.63 | 0.07 | 0.68 | 0.06 | 0.2287 | 0.62 | 0.61 | 0.62 |
| biomarker_a binary_group | treatment_response | random_forest | 0.3 | 0.61 | 0.64 | 0.07 | 0.7 | 0.08 | 0.2897 | 0.65 | 0.52 | 0.58 |
| biomarker_a sex | treatment_response | random_forest | 0.3 | 0.6 | 0.59 | 0.06 | 0.62 | 0.07 | 0.3338 | 0.62 | 0.57 | 0.59 |
| glucose binary_group | treatment_response | random_forest | 0.3 | 0.59 | 0.56 | 0.06 | 0.59 | 0.06 | 0.3048 | 0.61 | 0.54 | 0.57 |
| glucose sex binary_group | treatment_response | random_forest | 0.3 | 0.59 | 0.5 | 0.05 | 0.55 | 0.07 | 0.3201 | 0.6 | 0.57 | 0.58 |
| glucose biomarker_a | treatment_response | random_forest | 0.3 | 0.54 | 0.57 | 0.06 | 0.6 | 0.07 | 0.2768 | 0.56 | 0.5 | 0.53 |
| glucose | treatment_response | random_forest | 0.3 | 0.52 | 0.49 | 0.03 | 0.48 | 0.03 | 0.3299 | 0.53 | 0.54 | 0.54 |
| glucose biomarker_a sex | treatment_response | random_forest | 0.3 | 0.51 | 0.59 | 0.04 | 0.61 | 0.05 | 0.2751 | 0.52 | 0.48 | 0.5 |
| glucose | treatment_response | logistic_regression | 0.3 | 0.5 | 0.5 | 0.01 | 0.53 | 0.07 | 0.2524 | 0.54 | 0.15 | 0.24 |
| biomarker_a | treatment_response | random_forest | 0.3 | 0.5 | 0.53 | 0.1 | 0.55 | 0.11 | 0.3568 | 0.51 | 0.52 | 0.52 |
| glucose sex | treatment_response | random_forest | 0.3 | 0.5 | 0.44 | 0.03 | 0.41 | 0.06 | 0.369 | 0.51 | 0.48 | 0.49 |
| glucose | treatment_response | support_vector_machine | 0.3 | 0.49 | 0.52 | 0 | 0.46 | 0.07 | 0.2502 | 0.0 | 0.0 | 0.0 |
| sex | treatment_response | logistic_regression | 0.3 | 0.49 | 0.48 | 0.05 | 0.44 | 0.01 | 0.2528 | 0.0 | 0.0 | 0.0 |
| sex | treatment_response | support_vector_machine | 0.3 | 0.49 | 0.48 | 0.05 | 0.47 | 0.04 | 0.2503 | 0.0 | 0.0 | 0.0 |
| sex | treatment_response | random_forest | 0.3 | 0.49 | 0.5 | 0.04 | 0.44 | 0.01 | 0.2535 | 0.0 | 0.0 | 0.0 |
| glucose sex | treatment_response | support_vector_machine | 0.3 | 0.49 | 0.49 | 0.06 | 0.46 | 0.04 | 0.2499 | 0.0 | 0.0 | 0.0 |
| glucose sex | treatment_response | logistic_regression | 0.3 | 0.47 | 0.47 | 0.03 | 0.5 | 0.08 | 0.2532 | 0.43 | 0.13 | 0.2 |
