# Supplementary material
Source: Research Square preprint supplement (doi:10.21203/rs.3.rs-10251397/v1)
Supplement: Supplementary file 2 [file 8e4d4d5661cb0b6f99d9d20d.docx]

**Supplementary Table 3. Representative Peer-Reviewed Studies Utilizing Wistats**

| **Field** | **Study** | **Journal** | **Year** | **DOI** |
| --- | --- | --- | --- | --- |
| Metabolic Medicine | Uric acid-to-albumin ratio is associated with metabolic syndrome in a large adult cohort | Biomolecules and Biomedicine | 2026 | 10.17305/bb.2026.14193 |
| Gynecology / AI | An AI-Driven Clinical Decision Support Model Based on Anemia and Fibroid Parameters to Guide Surgical Decision-Making | Medicina | 2026 | 10.3390/medicina62030555 |
| Gynecology / ML | HbA1c as a Key Metabolic Marker in Predicting Myomectomy Requirement in Women with Uterine Fibroids | Medicina | 2026 | 10.3390/medicina62030500 |
| Gynecology / CDS | An AI-Driven Clinical Decision Support Framework Utilizing Female Sex Hormone Parameters for Surgical Decision Guidance in Uterine Fibroid Management | Medicina | 2026 | 10.3390/medicina62010001 |
| Gynecology / ML | Prediction of surgery type for uterine fibroids using machine learning algorithms and hormone values | Medicine (Baltimore) | 2025 | 10.1097/MD.0000000000047965 |
| Urogynecology | Patient satisfaction and objective outcomes after Burch colposuspension for female stress urinary incontinence | J Health Sci Med | 2025 | 10.32322/jhsm.1906810 |
| Psychiatry / EEG | Quantitative EEG Assessment of Dependence-Related Neurophysiological Patterns Using Rule- and Score-Based Modeling in Substance Use Disorders | Medicina | 2026 | 10.3390/medicina62030608 |
| Oncology | Prognostic value of preoperative mGPS, CAR, and NLR in patients undergoing resection for non-small cell lung cancer | Biomolecules and Biomedicine | 2026 | 10.17305/bb.2026.14295 |
| Stroke | Clinical utility of the RACE score for differentiating stroke from stroke mimics in the emergency department | Frontiers in Neurology | 2026 | 10.3389/fneur.2026.1832156 |
| Stroke | Clinical symptoms associated with prehospital delay in first-ever acute stroke | Biomolecules and Biomedicine | 2026 | 10.17305/bb.2026.14308 |
| Neuroimaging | Texture-Based MRI Analysis Reveals Microstructural Alterations in the Putamen in Bipolar Disorder | Medicina | 2026 | 10.3390/medicina62050914 |
| Stroke | Real-World Comparison of Stroke Practitioner-Led and Neurohospitalist-Led Acute Ischemic Stroke Workflows | Healthcare | 2026 | https://doi.org/10.3390/healthcare14131989 |
