# Supplementary material
Source: Research Square preprint supplement (doi:10.21203/rs.3.rs-10251397/v1)
Supplement: Supplementary file 3 [file 960a8cee6eea63394033393a.docx]

**Supplementary Table 1. Wistats Validation machine learning results regression based output**

| **input** | **output** | **model** | **test_size** | **r2_score** | **cross_validation_r2_mean** | **cross_validation_r2_std** | **mean_absolute_error** | **mean_squared_error** | **root_mean_squared_error** |
| --- | --- | --- | --- | --- | --- | --- | --- | --- | --- |
| Treatment Status | length_of_stay | support_vector_machine | 0.3 | 0.01 | -0.09 | 0.12 | 3.006 | 16.0064 | 4.0008 |
| Sex; Treatment Status | length_of_stay | linear_regression | 0.3 | 0.01 | -0.05 | 0.04 | 3.2762 | 16.1282 | 4.016 |
| Treatment Status; Systolic BP | length_of_stay | linear_regression | 0.3 | 0.01 | -0.03 | 0.03 | 3.2756 | 16.1211 | 4.0151 |
| Sex; Treatment Status; Systolic BP | length_of_stay | linear_regression | 0.3 | 0.01 | -0.05 | 0.04 | 3.2725 | 16.0947 | 4.0118 |
| Treatment Status | length_of_stay | linear_regression | 0.3 | 0 | -0.02 | 0.03 | 3.2792 | 16.1535 | 4.0191 |
| Sex; Treatment Status | length_of_stay | support_vector_machine | 0.3 | 0 | -0.1 | 0.09 | 3.0212 | 16.1821 | 4.0227 |
| Sex | length_of_stay | support_vector_machine | 0.3 | -0.01 | -0.1 | 0.09 | 3.0733 | 16.45 | 4.0559 |
| Biomarker A; Systolic BP | length_of_stay | support_vector_machine | 0.3 | -0.01 | -0.05 | 0.1 | 2.977 | 16.4561 | 4.0566 |
| Treatment Status; Systolic BP | length_of_stay | support_vector_machine | 0.3 | -0.01 | -0.1 | 0.09 | 3.1572 | 16.3785 | 4.047 |
| Biomarker A; Treatment Status; Systolic BP | length_of_stay | support_vector_machine | 0.3 | -0.01 | -0.05 | 0.1 | 2.9732 | 16.3642 | 4.0453 |
| Sex | length_of_stay | linear_regression | 0.3 | -0.02 | -0.06 | 0.04 | 3.2913 | 16.5847 | 4.0724 |
| Sex; Systolic BP | length_of_stay | linear_regression | 0.3 | -0.02 | -0.07 | 0.04 | 3.2925 | 16.5829 | 4.0722 |
| Biomarker A; Sex; Systolic BP | length_of_stay | support_vector_machine | 0.3 | -0.02 | -0.06 | 0.09 | 2.9818 | 16.5447 | 4.0675 |
| Biomarker A; Sex; Treatment Status; Systolic BP | length_of_stay | support_vector_machine | 0.3 | -0.02 | -0.05 | 0.1 | 2.9836 | 16.4899 | 4.0608 |
| Systolic BP | length_of_stay | linear_regression | 0.3 | -0.03 | -0.04 | 0.02 | 3.2936 | 16.6649 | 4.0823 |
| Systolic BP | length_of_stay | support_vector_machine | 0.3 | -0.03 | -0.12 | 0.09 | 3.1357 | 16.7861 | 4.0971 |
| Biomarker A; Treatment Status | length_of_stay | linear_regression | 0.3 | -0.04 | -0.04 | 0.03 | 3.3444 | 16.9019 | 4.1112 |
| Biomarker A; Sex; Treatment Status | length_of_stay | linear_regression | 0.3 | -0.04 | -0.06 | 0.03 | 3.3413 | 16.8726 | 4.1076 |
| Biomarker A; Treatment Status; Systolic BP | length_of_stay | linear_regression | 0.3 | -0.04 | -0.04 | 0.03 | 3.3413 | 16.8867 | 4.1093 |
| Biomarker A; Sex; Treatment Status; Systolic BP | length_of_stay | linear_regression | 0.3 | -0.04 | -0.06 | 0.03 | 3.3367 | 16.856 | 4.1056 |
| Sex; Treatment Status; Systolic BP | length_of_stay | support_vector_machine | 0.3 | -0.05 | -0.13 | 0.08 | 3.2299 | 16.9754 | 4.1201 |
| Biomarker A; Sex | length_of_stay | linear_regression | 0.3 | -0.06 | -0.07 | 0.03 | 3.3806 | 17.2479 | 4.1531 |
| Biomarker A; Sex; Systolic BP | length_of_stay | linear_regression | 0.3 | -0.06 | -0.08 | 0.03 | 3.3808 | 17.2744 | 4.1562 |
| Biomarker A | length_of_stay | linear_regression | 0.3 | -0.07 | -0.05 | 0.03 | 3.386 | 17.3192 | 4.1616 |
| Biomarker A; Systolic BP | length_of_stay | linear_regression | 0.3 | -0.07 | -0.05 | 0.03 | 3.3872 | 17.3458 | 4.1648 |
| Sex; Systolic BP | length_of_stay | support_vector_machine | 0.3 | -0.07 | -0.15 | 0.08 | 3.2298 | 17.2996 | 4.1593 |
| Biomarker A; Treatment Status | length_of_stay | support_vector_machine | 0.3 | -0.15 | -0.14 | 0.08 | 3.305 | 18.6327 | 4.3166 |
| Biomarker A; Sex; Treatment Status | length_of_stay | support_vector_machine | 0.3 | -0.19 | -0.16 | 0.06 | 3.3185 | 19.2593 | 4.3885 |
| Biomarker A | length_of_stay | support_vector_machine | 0.3 | -0.21 | -0.18 | 0.05 | 3.426 | 19.604 | 4.4276 |
| Biomarker A; Sex | length_of_stay | support_vector_machine | 0.3 | -0.23 | -0.2 | 0.03 | 3.3989 | 19.9601 | 4.4677 |
